# Supplementary material for: Galvanic Corrosion of E690 Offshore Platform Steel in a Simulated Marine Thermocline
Source: Preprints.org preprint supplement (doi:10.20944/preprints202401.1737.v1), 2024-01-24
Supplement: Supplementary file 1 [file supplementary]

Archive with 6 entries (6 files):
- Supplementary File/Certificate of Editing.pdf
- Supplementary File/cover letter.doc
- Supplementary File/Declaration of Interest Statement.pdf
- Supplementary File/Figures.doc
- Supplementary File/Highlights.doc
- Supplementary File/Tables.doc
