# Supplementary material for: Galvanic Corrosion of E690 Offshore Platform Steel in a Simulated Marine Thermocline
Source: Preprints.org preprint supplement (doi:10.20944/preprints202401.1737.v1), 2024-01-24
Supplement: Supplementary file 1 [file supplementary › Supplementary File/Declaration of Interest Statement.pdf]

## Declaration of Interest Statement

We declare that we have no financial and personal relationships with other people or organization that can inappropriately influence our work, there is no professional or other personal interest any nature or kind in any product, service and/or company that could be construed as influencing the position presented in, or the review of, the manuscript entitled.

Author signature:

Jiezheng Hu      Guodong Lin      Peichang Deng

Ziyun Li      Yunan Tian
